# Supplementary material
Source: Springer Nature journal article supplement (https://www.springermedizin.de/resource/supplementary/13256_2009_938_MOESM4_ESM.pdf/9646858)

# Resumo Gráfico

SpO2 (10 % por divisão)

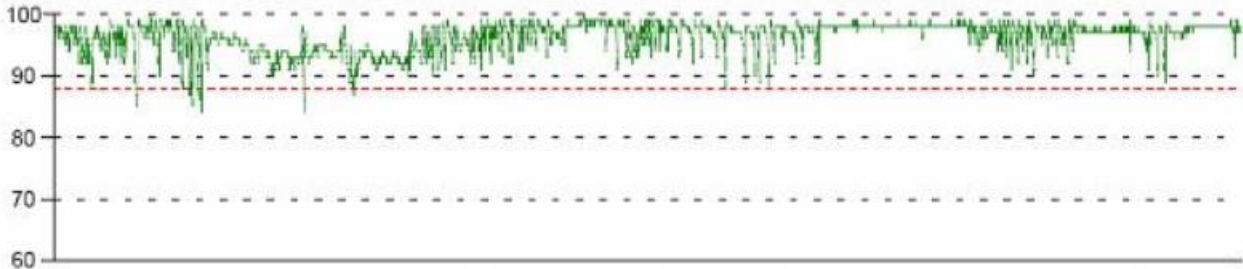

Episódios

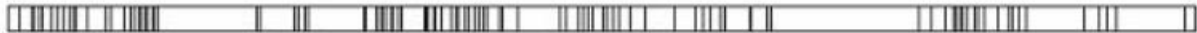

Supplement: MOESM4 [file 9646858]
